# Supplementary material
Source: PubMed Central journal article supplement (PMC3535635)
Supplement: 1218087109_pnas.201218087SI.pdf [file 1218087109_pnas.201218087SI.pdf]

# Supporting Information

Amaral et al. 10.1073/pnas.1218087109

## SI Materials and Methods

**Molecular Dynamics Protocol.** The molecular dynamics (MD) simulations were carried out using the program NAMD2 (1). Langevin dynamics was applied to keep the temperature (300 K) fixed. The equations of motion were integrated using a multiple time-step algorithm (2). Short- and long-range forces were calculated every 1 and 2 time steps, respectively, with a time step of 2.0 fs. Chemical bonds between hydrogen and heavy atoms were constrained to their equilibrium value. Long-range electrostatic forces were taken into account using the particle mesh Ewald (PME) approach (3), and the water molecules were described using the TIP3P model (4). The simulation used the CHARMM22-CMAP force field with torsional cross-terms for the protein (5) and the all-atom CHARMM36 force field for the phospholipids (6).

**Simulating NavAb Structures Under Hyperpolarized-Membrane Conditions.** With the purpose of performing structure-based gating-charge measurements (see below), each of the membrane-equilibrated NavAb structures  $NX^{++}$ ,  $NX$ ,  $NX^{-}$ , and  $NX^{--}$  was simulated under hyperpolarized-membrane conditions using a charge-imbalance protocol (7). In this scheme, the channel-membrane system is bathed in  $\sim 100$  mM NaCl salt concentration and air-water interfaces are then created at both sides of the membrane by extending the length of the simulation box in the direction perpendicular to the membrane. After a short equilibration of 1 ns run at constant volume, a transmembrane (TM) potential,  $\Delta V$ , is imposed on the system by displacing  $Na^{+}$  ions from one aqueous compartment to the other, while keeping the overall concentration of the bulk phases constant. Because the channel-membrane system behaves as a condenser, the imbalance  $q_0$  between the electrolytes creates  $\Delta V$  (Fig. S2). Production runs were performed at constant volume.

**Electrostatic Potential.** For a given system configuration  $j$ , the electrostatic potential  $\Phi_j(\vec{r}, \Delta V)$  at position  $\vec{r}$  was computed using the PME method as implemented in NAMD (8). In this scheme, the potential is obtained by solving Poisson's equation,

$$\nabla^2 \Phi_j(\vec{r}, \Delta V) = -4\pi \sum_i \rho_i(\vec{r}), \quad [S1]$$

where  $\rho_i$  is the point charge approximated by a spherical Gaussian of inverse width  $\sigma_i$  and the summation runs over all atoms in the system. We considered a grid of  $1.5 \times 1.5 \times 1.5 \text{ \AA}^3$  and  $\sigma = 0.25 \text{ \AA}^{-1}$ .

**Direct Measurement of Gating Charges.** For a channel-membrane system, the voltage difference  $\Delta V$  across the membrane is defined as  $\Delta V = V_i - V_e$ , with  $V_i$  and  $V_e$ , respectively, as the voltages of the internal and external membrane regions. In the present protocol,  $\Delta V$  is related to the charge imbalance,  $q_0$ , between the electrolytes through  $\Delta V = C^{-1} Q_0$ . Here,  $Q_0$  is the charge imbalance  $q_0$  per membrane area  $A$ , that is,  $Q_0 = A^{-1} q_0$ . The quantity  $C$  is the membrane capacitance, which is constant for the channel-membrane system (9, 10), and  $q_0$  can be written as  $q_0 = q_i - q_e$ , with  $q_i$  and  $q_e$  being, respectively, the net charge within the internal and external regions of the system. Note that  $q_0$  results from contributions from protein charges and ions in solution,  $q_0 = q_0^{protein} + q_0^{ion}$  and, accordingly, we can relate  $q_0^{protein}$  to  $\Delta V$  through  $q_0^{protein} = -q_0^{ion} + AC\Delta V$ . This allows us to compute the gating charge ( $Q$ ) associated with two conformational states of the channel  $\lambda_1$  and  $\lambda_2$  as

$$Q = -\frac{1}{2} [q_0^{protein}(\lambda_2) - q_0^{protein}(\lambda_1)] \quad [S2]$$

with  $q_0^{protein}(\lambda_2)$  and  $q_0^{protein}(\lambda_1)$  being the charge imbalance due to protein charges in the  $\lambda_1$  and  $\lambda_2$  conformations, respectively.

Here, for each of the membrane-bound NavAb structures  $NX^{++}$ ,  $NX$ ,  $NX^{-}$ , and  $NX^{--}$ , the electrostatic potential,  $\Phi_j(\vec{r}, \Delta V)$ , was calculated as an average over  $n = 100$  system configurations sampled along 1 ns of a hyperpolarized-membrane simulation, that is,

$$\Phi(\vec{r}, \Delta V) = \frac{1}{100} \sum_{j=1}^{100} \Phi_j(\vec{r}, \Delta V). \quad [S3]$$

The average of  $\Phi_j(\vec{r}, \Delta V)$  over  $x$  and  $y$  provides the electrostatic potential profile  $\Phi_z$  along the membrane normal (Fig. S2), and the difference between the  $\Phi_z$  values at the two electrolyte regions of the systems provides the estimate of  $\Delta V$ ; as a reference,  $\Phi_z$  was set to zero in the upper electrolyte. Finally, by considering Eq. S2, we compute the gating charge associated with each of the NavAb structures by considering the channel conformation  $NX^{++}$  as the reference structure (Table S3). Here, we compute  $q_0^{ion}$  relative to the center of the bilayer and consider the membrane capacitance estimated for a channel-membrane system, that is,  $C = 0.9 \times 10^{-22} \text{ C} \cdot \text{V}^{-1} \cdot \text{\AA}^{-2}$  (9);  $\Delta V$  corresponds to the voltage estimated from the average over a simulation time window of 1 ns.

**Conformational Analysis of Voltage-Sensor Domains and Pore Domains.** The values of the two generalized coordinates,  $R$  ( $NavAb, VSD; t$ ) =  $R$  and  $R$  ( $NavAb, PD; t$ ) =  $P$  were computed along the MD trajectory using the formula

$$R(NavAb, l; t) = [D(KR, l, KA, l) + D(NavAb, l, KR, l; t) - D(NavAb, l, KA, l; t)] / 2 D(KR, l, KR, l), \quad [S4]$$

where  $D(KR, l, KA, l)$  is the rmsd between the distance matrices of domain  $l$  in the activated-open (KA) and resting-closed (KR) structures.  $D(NavAb, l, KR, l; t)$  and  $D(NavAb, l, KA, l; t)$  are the rms deviations between the instantaneous distance matrix of domain  $l$  in NavAb and the corresponding matrices of KA and KR, respectively. Distance matrices are defined as  $M_{ij}(NavAb, l; t) = r_{ij}(NavAb, l; t)$ , where  $l$  is the domain considered ( $l \in \{VSD, PD\}$ ) and  $r_{ij}$  is the distance between the geometrical centers of the charged moiety of a given S4 residue ( $j \in \{R_1, R_2, \dots, R_4\}$ ) and the charged moiety of a given negatively charged or polar group ( $i \in \{B_1, B_2, \dots, B_6\}$ ). For the pore-domain (PD) distance matrix, we consider three PD-lining residues in the S6-helix bundle ( $i, j \in \{F_1, F_2, F_3\}$ );  $r_{ij}$  is the  $C_{\alpha}$ - $C_{\alpha}$  average distance between nonadjacent subunit ( $i, j$ ) pairs.

**Sampling Selected Voltage-Sensor Domain Conformations.** The present procedure consisted of applying a biased and an equilibrium MD simulation to the membrane-bound NavAb structure,  $NX$ , to guide it to a given  $R$  value and then relaxing the structure at that conformational distance without constraints. Note that the PD structure is also unconstrained. Three independent trajectories were generated, sampling NavAb conformations at  $R = 0.85 \pm 0.02$ ,  $0.38 \pm 0.06$ , and  $0.14 \pm 0.01$  [average values over the four voltage-sensor domain (VSD) subunits]. The final membrane-equilibrated structures obtained from these simulations

are referred to as  $NX^{++}$ ,  $NX^{-}$ , and  $NX^{--}$ , respectively. In detail, the biasing part of the MD simulation sampling the NavAb conformation at  $R = 0.85 \pm 0.02$  was accomplished as follows. The voltage sensors of NX and KA were first superposed, taking into consideration the main-chain atoms of the binding sites  $B_2$  through  $B_5$ . A set of harmonic constraints, with a magnitude of  $4.5 \text{ kcal}\cdot\text{mol}^{-1}\cdot\text{\AA}^{-2}$  and a velocity of  $0.25 \text{ \AA}/\text{ns}$ , was then applied on the  $C_{\alpha}$  and the side-chain atoms  $H_2N = C_{\epsilon}(\text{NH}_2) - N_{\epsilon}H - C_{\delta}H_2$  of the S4 basic residues of NX, pulling the four VSDs toward KA until the channel reached the target conformational distance; the  $C_{\alpha}$  atom positions of the protein's negatively charged binding sites  $B_2$  through  $B_5$  were fixed by harmonic constraints during the procedure. By pulling the NX VSD structures toward KR, we followed the same protocol to sample the NavAb conformation at  $R = 0.38 \pm 0.06$  and  $0.14 \pm 0.01$ . After the initial biasing step, the harmonic constraints are slowly released (over  $\sim 4$  ns) from the N to the C terminus of the protein. The equilibrium regime was achieved after relaxation of the channel structure for  $\sim 30$  ns, without any applied constraints (Fig. S1).

**Sampling Selected PD Conformations.** In two independent MD simulations, the PD-closed structures NX and  $NX^{++}$  were first biased toward an open-PD conformation ( $P \sim 0.9$ ) and then submitted to relaxation without any constraints for  $\sim 30$  ns. The final membrane-equilibrated structures obtained from these MD runs are labeled  $NX^{PO}$  and  $NX^O$ , respectively. In these simulations, by considering the main-chain atoms of residues  $F_1$  through  $F_3$  (Table S1) of NX and  $NX^{++}$  superposed on KA, the structure of NavAb was pulled toward KA by applying harmonic constraints ( $4.5 \text{ kcal}\cdot\text{mol}^{-1}\cdot\text{\AA}^{-2}$  and  $0.25 \text{ \AA}/\text{ns}$ ) on the  $C_{\alpha}$  atoms of residues  $F_1$  through  $F_3$ , while constraining the VSD and the S4–S5 linker at their reference NX or  $NX^{++}$  configuration; each pulling procedure lasted until the target conformational distance

of  $\sim 0.9$  was reached. After the initial step, the channel was equilibrated following the same protocol as for sampling NavAb conformations along R, that is, annealing ( $\sim 4$  ns) plus unconstrained equilibration ( $\sim 30$  ns).

**Structural Analysis of PD.** We analyzed the pore-radius profiles of the final structures resulting from the equilibration runs for  $NX^O$  and  $NX^{PO}$ . As expected,  $NX^{PO}$  shows an intermediate character compared with  $NX^O$  and NX. Indeed, the radius of the pore at the constriction region is  $\sim 1.0$ ,  $\sim 2.0$ , and  $3.0 \text{ \AA}$  for NX,  $NX^{PO}$ , and  $NX^O$ , respectively. Importantly, the constriction results from the close proximity of different residues in  $NX^{PO}$  and  $NX^O$ ; the major constraining element is Met<sup>221</sup> for the former and Ile<sup>217</sup> for the latter.

**Secondary Structure Content of the S4 Segment.** To detect possible  $\alpha$ - to  $3_{10}$ -helix transitions in S4 occurring along the activation pathway, we analyzed the secondary structure content of the segment spanning residues 96–112 using STRIDE (11). Relative occupancies of each of the secondary structure states defined in STRIDE were computed by taking the average over the four subunits and over the molecular configurations sampled along the equilibrium part of the trajectory. Interestingly, the secondary structure content is significantly different across the states: in the central and C-terminal regions of S4, the  $3_{10}$ -helix content is larger in  $NX^{++}$  than in NX, and almost absent in  $NX^{-}$  and  $NX^{--}$ . These results are consistent with those previously obtained for Kv1.2, which shows a larger  $3_{10}$ -helix propensity only in the C-terminal region of S4 in the activated conformation. Transition to the resting-state conformation during deactivation causes S4 to refold into an  $\alpha$ -helix. Importantly, all of the resting-state models of Kv1.2 proposed so far show S4 in an  $\alpha$ -helix conformation.

- Phillips JC, et al. (2005) Scalable molecular dynamics with NAMD. *J Comput Chem* 26 (16):1781–1802.
- Izaguirre JA, Reich S, Skeel RD (1999) Longer time steps for molecular dynamics. *J Chem Phys* 110(20):9853–9864.
- Darden T, York D, Pedersen L (1993) Particle mesh Ewald: An N-log(N) method for Ewald sums in large systems. *J Chem Phys* 98(12):10089–10092.
- Jorgensen WL, Chandrasekhar J, Madura JD, Impey RW, Klein ML (1983) Comparison of simple potential functions for simulating liquid water. *J Chem Phys* 79(2):926–935.
- MacKerell AD, Jr., Feig M, Brooks CL III (2004) Improved treatment of the protein backbone in empirical force fields. *J Am Chem Soc* 126(3):698–699.
- Klauda JB, et al. (2010) Update of the CHARMM all-atom additive force field for lipids: Validation on six lipid types. *J Phys Chem B* 114(23):7830–7843.
- Delemotte L, Dehez F, Treptow W, Tarek M (2008) Modeling membranes under a transmembrane potential. *J Phys Chem B* 112(18):5547–5550.
- Aksimentiev A, Schulten K (2005) Imaging  $\alpha$ -hemolysin with molecular dynamics: Ionic conductance, osmotic permeability, and the electrostatic potential map. *Biophys J* 88 (6):3745–3761.
- Treptow W, Tarek M, Klein ML (2009) Initial response of the potassium channel voltage sensor to a transmembrane potential. *J Am Chem Soc* 131(6):2107–2109.
- Stefani E, Toro L, Perozo E, Bezanilla F (1994) Gating of Shaker K<sup>+</sup> channels: I. Ionic and gating currents. *Biophys J* 66(4):996–1010.
- Frishman D, Argos P (1995) Knowledge-based protein secondary structure assignment. *Proteins* 23(4):566–579.

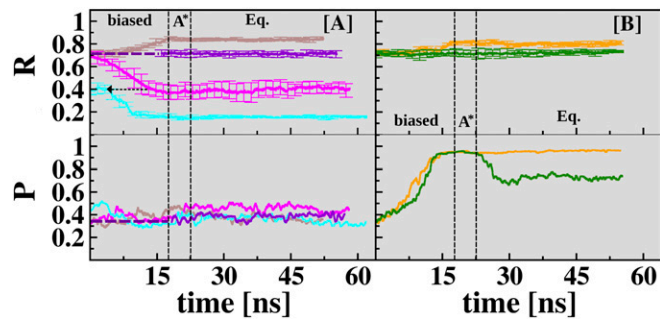

**Fig. S1.** Membrane-equilibrated conformations of NavAb. (A)  $R$  ( $NavAb, VSD$ ;  $t$ ) =  $R$  and  $R$  ( $NavAb, PD$ ;  $t$ ) =  $P$  profiles for the MD trajectories of the membrane-equilibrated NavAb conformations  $NX^{++}$  (brown),  $NX$  (violet),  $NX^{-}$  (magenta), and  $NX^{-}$  (cyan). Labels: biased,  $A^*$ , and Eq. indicate, respectively, the biased, annealing, and equilibration phases of the MD trajectories. (B) As in A for the NavAb conformations  $NX^O$  (orange) and  $NX^{PO}$  (green). The profiles are computed according to Eq. 1;  $R$  profiles are averaged over the four channel subunits. Note the significant relaxation of  $P$  in the simulation, yielding the partially open channel structure,  $NX^{PO}$ . The equilibrium portion of the profiles is plotted in Fig. 1 to represent the projection of the MD trajectories onto the conformation-distance space  $\{R$  ( $NavAb, VSD$ ),  $P$  ( $NavAb, PD$ )}.

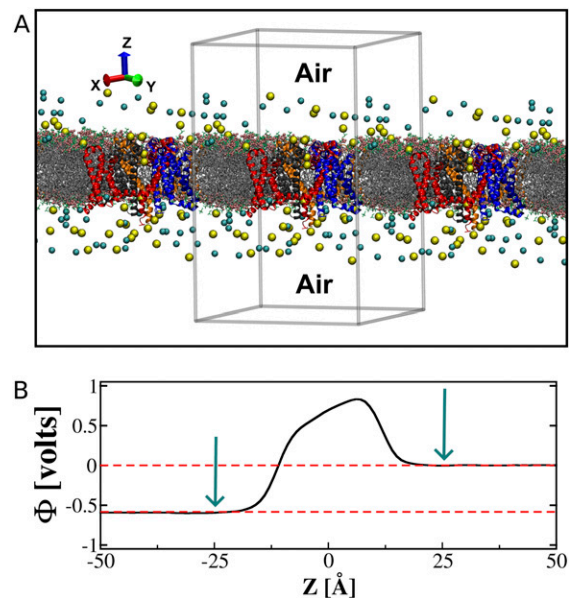

**Fig. S2.** Charge-imbalance simulation protocol enabling the application of a TM potential. (A) Cartoon illustrating a typical simulation setup of the channel embedded in a POPC (1-Palmitoyl-2-oleoylphosphatidylcholine) bilayer (licorice), surrounded by a 100 mM NaCl solution (Na in yellow, Cl in cyan, and water removed for visual clarity) and delimited by a pair of air–water interfaces along the  $z$  direction. The dimensions of the simulation box (gray) are  $x = 130$  Å,  $y = 130$  Å, and  $z = 300$  Å. (B) Electrostatic potential profile along the bilayer normal,  $z$  of the channel-membrane system at hyperpolarized potentials.  $\Phi_z$  is the average of  $\Phi(r, \Delta V)$  over  $x$  and  $y$  coordinates. As a reference,  $\Phi_z$  is set to zero in the upper electrolyte. In the present protocol,  $\Phi_z$  shows plateau values in the aqueous regions (arrows). The red dashed lines define the applied voltage across the membrane bilayer. The difference between the plateau values at the two electrolytes corresponds to the TM potential  $\Delta V$ .



**Table S1. Residues/groups considered for computation of the VSD and PD distance matrices**

| Channel | R <sub>1</sub> , ..., R <sub>4</sub> <sup>*</sup>                         | B <sub>1</sub> , ..., B <sub>6</sub> <sup>*</sup>                                                                                                      | F <sub>1</sub> , ..., F <sub>3</sub>                   |
|---------|---------------------------------------------------------------------------|--------------------------------------------------------------------------------------------------------------------------------------------------------|--------------------------------------------------------|
| Kv1.2   | R <sup>294</sup> , R <sup>297</sup> , R <sup>300</sup> , R <sup>303</sup> | PO <sub>4</sub> <sup>-</sup> (outer), E <sup>183</sup> , E <sup>226</sup> , D <sup>259</sup> , E <sup>236</sup> , PO <sub>4</sub> <sup>-</sup> (inner) | I <sup>402</sup> , V <sup>406</sup> , V <sup>410</sup> |
| NavAb   | R <sup>99</sup> , R <sup>102</sup> , R <sup>105</sup> , R <sup>108</sup>  | PO <sub>4</sub> <sup>-</sup> (outer), E <sup>32</sup> , N <sup>49</sup> , E <sup>59</sup> , D <sup>80</sup> , PO <sub>4</sub> <sup>-</sup> (inner)     | M <sup>209</sup> , V <sup>213</sup> , I <sup>217</sup> |
| NavRh   | R <sup>102</sup> , R <sup>105</sup> , R <sup>108</sup> , R <sup>111</sup> | PO <sub>4</sub> <sup>-</sup> (outer), N <sup>25</sup> , D <sup>48</sup> , E <sup>58</sup> , D <sup>81</sup> , PO <sub>4</sub> <sup>-</sup> (inner)     | I <sup>211</sup> , V <sup>215</sup> , L <sup>219</sup> |

<sup>\*</sup>For computation of the  $r_{ij}$  distances in the voltage-sensor distance matrix, the  $ij$  moieties correspond to the side-chain atoms H<sub>2</sub>N = C<sub>ε</sub>(NH<sub>2</sub>)—N<sub>ε</sub>H—C<sub>δ</sub>H<sub>2</sub> (Arg), —OOC<sub>γ</sub>—C<sub>β</sub>H<sub>2</sub> (Asp), H<sub>2</sub>N<sub>δ2</sub>O<sub>δ1</sub>C<sub>δ</sub>—C<sub>β</sub>H<sub>2</sub> (Asn), —OOC<sub>δ</sub>—C<sub>γ</sub>H<sub>2</sub> (Glu), and the lipid phosphate group PO<sub>4</sub><sup>-</sup>.

**Table S2. Rmsd (Å) between NavAb and the reference structures KA, KR, and NavRh**

| Reference | NX <sup>++</sup> |             | NX           |             | NX <sup>-</sup> |             | NX <sup>--</sup> |              |
|-----------|------------------|-------------|--------------|-------------|-----------------|-------------|------------------|--------------|
|           | S4               | VSD         | S4           | VSD         | S4              | VSD         | S4               | VSD          |
| NavRh     | 2.47 ± 0.99      | 2.55 ± 0.29 | 3.93 ± 0.12  | 3.25 ± 0.86 | 11.26 ± 1.46    | 6.08 ± 0.66 | 20.07 ± 1.21     | 10.43 ± 0.72 |
| KA        | 3.59 ± 0.71      | 3.99 ± 0.17 | 4.48 ± 0.21  | 4.76 ± 0.10 | 8.36 ± 1.03     | 5.73 ± 0.20 | 16.74 ± 1.21     | 9.01 ± 0.49  |
| KR        | 16.93 ± 0.94     | 9.19 ± 0.38 | 16.10 ± 0.64 | 9.00 ± 0.30 | 7.99 ± 1.62     | 5.98 ± 0.94 | 5.13 ± 0.92      | 4.11 ± 0.74  |

The rmsd values are estimates of the overall displacement of backbone segments of S4 and VSD. The rmsd values are calculated by superposing the acidic/polar binding sites within the VSD and are presented as averages over the four subunits.

**Table S3. Direct measure of Q for the VSD conformations NX<sup>++</sup>, NX, NX<sup>-</sup>, and NX<sup>--</sup>**

| Conformations    | ΔV (volts) | Lipid area (Å <sup>2</sup> ) | $q_0^{ion}$ (e) <sup>*</sup> | $q_0^{protein}$ (e) <sup>†</sup> | Q (e) <sup>‡</sup> |
|------------------|------------|------------------------------|------------------------------|----------------------------------|--------------------|
| NX <sup>++</sup> | -0.708     | 17309.1                      | -14                          | 6.35                             | 0                  |
| NX               | -0.683     | 17229.9                      | -18                          | 10.63                            | -2.14              |
| NX <sup>-</sup>  | -0.674     | 16663.0                      | -30                          | 22.99                            | -8.32              |
| NX <sup>--</sup> | -0.697     | 17251.8                      | -38                          | 30.50                            | -12.08             |

<sup>\*</sup> $q_0^{ion}$  was computed relative to the center of the bilayer.

<sup>†</sup>Membrane capacitance  $C = 0.9 \times 10^{-22} \text{ C}\cdot\text{V}^{-1}\cdot\text{Å}^{-2}$ ; ΔV corresponds to the voltage estimated from the average over a simulation-time window of 1 ns.

<sup>‡</sup>Q was computed according to Eq. S2 and considering NX<sup>++</sup> as a reference.

**Table S4. NavAb interatomic C<sub>β</sub>—C<sub>β</sub> average distances (Å) between S4 residues (E96 and R<sub>1</sub> to R<sub>4</sub>) and the polar binding sites N25 and N49 from segments S1 and S2**

| Residue pairs                    | NX <sup>++</sup>     | NX                   | NX <sup>-</sup>      | NX <sup>--</sup>     |
|----------------------------------|----------------------|----------------------|----------------------|----------------------|
| E <sup>96</sup> -N <sup>25</sup> | 24.11 ± 1.22 (22.65) | 22.57 ± 0.43 (21.87) | 13.87 ± 1.24 (12.25) | 8.66 ± 0.51 (8.06)   |
| R <sub>1</sub> -N <sup>25</sup>  | 19.53 ± 0.96 (18.18) | 17.16 ± 0.73 (16.11) | 9.47 ± 0.82 (8.65)   | 8.88 ± 0.88 (7.68)   |
| R <sub>2</sub> -N <sup>25</sup>  | 13.74 ± 1.03 (12.01) | 11.69 ± 0.78 (10.61) | 7.67 ± 1.11 (6.40)   | 13.31 ± 1.11 (11.90) |
| R <sub>3</sub> -N <sup>25</sup>  | 9.45 ± 0.26 (9.14)   | 6.49 ± 0.26 (6.05)   | 10.38 ± 1.50 (8.44)  | 18.56 ± 1.26 (16.86) |
| R <sub>4</sub> -N <sup>25</sup>  | 9.74 ± 0.54 (8.93)   | 8.36 ± 0.55 (7.72)   | 14.89 ± 1.99 (11.71) | 22.78 ± 1.31 (20.95) |
| E <sup>96</sup> -N <sup>49</sup> | 18.96 ± 1.32 (17.24) | 19.69 ± 0.33 (19.13) | 11.00 ± 1.70 (8.96)  | 11.38 ± 0.93 (10.15) |
| R <sub>1</sub> -N <sup>49</sup>  | 15.60 ± 1.11 (14.40) | 14.14 ± 1.04 (12.47) | 10.32 ± 1.33 (8.21)  | 13.98 ± 1.07 (12.67) |
| R <sub>2</sub> -N <sup>49</sup>  | 10.49 ± 0.82 (9.56)  | 10.02 ± 0.95 (8.89)  | 9.98 ± 2.05 (6.48)   | 19.21 ± 1.23 (17.52) |
| R <sub>3</sub> -N <sup>49</sup>  | 7.91 ± 0.61 (7.38)   | 9.08 ± 0.45 (8.62)   | 15.29 ± 1.46 (13.65) | 24.62 ± 1.19 (23.08) |
| R <sub>4</sub> -N <sup>49</sup>  | 10.40 ± 0.53 (9.97)  | 13.70 ± 0.49 (13.03) | 20.47 ± 1.38 (19.06) | 29.32 ± 1.13 (27.86) |

Pair distances are presented as averages over the four subunits; their minimum values are shown in parentheses.



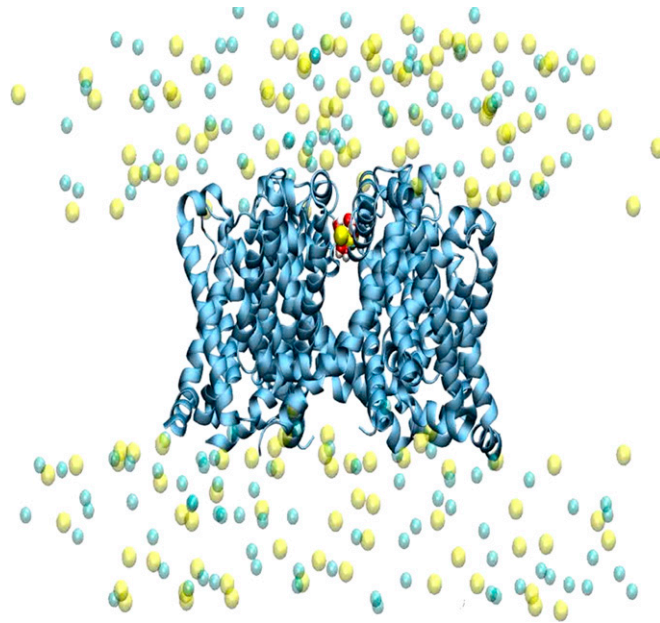

**Movie S1.** Short MD simulation under hyperpolarized-transmembrane conditions. The movie shows a conduction event of a fully hydrated  $\text{Na}^+$  ion across the open activation gate of NavAb.

[Movie S1](#)

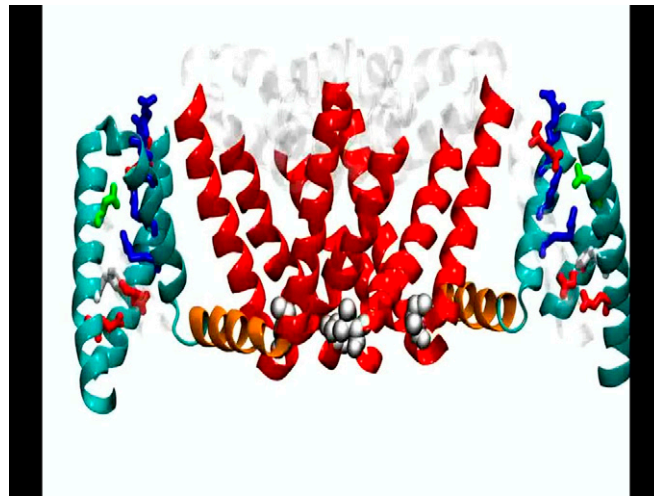

**Movie S2.** Sequential transitions of the NavAb sampled conformations from the activated-open ( $\text{NX}^{\text{O}}$ ) to the resting-closed state ( $\text{NX}^{\text{T}}$ ) of the channel. Only two subunits are shown for clarity. The VSD (cyan), S4–S5 linker (orange), and PD (red) are represented as cartoons; S4 arginines (blue), polar/acidic binding sites (green/red), and catalytic center residue  $\text{F}^{56}$  (white) are represented as sticks. The atoms of the hydrophobic gate residues  $\text{I}^{217}$  are rendered as silver spheres. Note the sequential slide of S4 arginines across the residue  $\text{F}^{56}$  and the hydrophobic collapse of residue  $\text{I}^{217}$ .

[Movie S2](#)
